# Supplementary material for: Heavy chain–only antibodies are spontaneously produced in light chain–deficient mice
Source: PubMed Central journal article supplement — J Exp Med. 2007 Dec 24;204(13):3271–83. doi: 10.1084/jem.20071155 (PMC2150980; doi:10.1084/jem.20071155), 2007-12-24
Supplement: jexpmed_jem.20071155_2.pdf [file jexpmed_jem.20071155_2.pdf]

**Table S1.** Primer sequences for PCR

| Primer                                 | Sequence                      |
|----------------------------------------|-------------------------------|
| Vgeneric                               | SADGTBCAGCTKMAGSAGTCWGG       |
| V3609                                  | CARRTTAYTCWGAAASWGCTGG        |
| VS107/J606                             | GARGTGMAGCTKGWDGARWCTGR       |
| J558                                   | SAGGTYCARCTSCARCAGYCTGG       |
| VGAM                                   | CAGATCCAGTTSGTRCAGTCTGG       |
| V7183/VH11                             | GAMGTGMAGCTSKTGAGWCTGG        |
| J <sub>H</sub> 1                       | CGGTCACCGTYCCTCAG             |
| J <sub>H</sub> 2                       | GCACCACTCTCACAGTCTCT          |
| J <sub>H</sub> 3                       | GGGACTCTGGTCACTGTCTCT         |
| J <sub>H</sub> 4                       | AACCTCAGTCACCGTCTCCTC         |
| J/hinge                                | CACCGTCTCCTCAGAGCCC           |
| $\gamma$ C <sub>H</sub> 2 <sup>a</sup> | TGTTGACCYTGCAITTTGAAC         |
| $\gamma$ C <sub>H</sub> 2 <sup>b</sup> | TTKGAGATGGTTYTCTCGATG         |
| $\gamma$ C <sub>H</sub> 2 <sup>c</sup> | gttgaccttgacattgaactcc        |
| $\gamma$ C <sub>H</sub> 2 <sup>d</sup> | TTGGAGGGAAAGATGAAGACGGATGG    |
| $\gamma$ C <sub>H</sub> 2 <sup>e</sup> | TGTTGACCYTGCAITTTGAACTCCTTGCC |
| $\beta$ -actin2                        | GATATCGCTGCGCTGGTC            |
| $\beta$ -actin4                        | CTACGTACATGGCTGGGGTG          |
| VDJ029                                 | CGGGGGGCTACGGCTACGTATGGG      |
| J <sub>H</sub> 4long                   | ggaacctcagtcacccgtctcctcag    |
| $\gamma$ 2bhingelong                   | AGTGACTTACCTGGGCATTTGTGACACTC |
| $\gamma$ 2aC <sub>H</sub> 2long        | AGGGCACTGACCACCCGGAG          |
| 3'E $\mu$                              | GACCTCTCCGAAACCAGGCACCGC      |
